# Supplementary material for: Assessing the Stress of Surgeons and Surgical Residents Using a Wearable Smart Device
Source: Research Square preprint supplement (doi:10.21203/rs.3.rs-141190/v1), 2021-01-14
Supplement: Supplementary file 1 [file c4f24b6d3e1bdbabd9400ebe.xlsx]

## Sheet: supplementary data
Case_number	Surgeon_position_OR	Surgeon_level	Total_experience	Surgeon_sex	Stress_base	preoperative_stress	postoperative_stress	diff(post-pre)_stress	preoperative_base_stress	postoperative_base_stress	Stress elevation_base_to_postop	HR_base	preop_HR	postop_HR	post-pre_HR	pre-base_HR	postop-base_HR	SpO2_base	preop_SpO2	post op_SpO2	post-pre_SpO2	pre_base_SpO2	postop_base_Spo2	STAI_preop	STAI_postop	delta_STAI	ID	Age	Sex	Height	Weight	BMI	underlying_none	Cardiovascular_dz	Cerebrovascular_dz	CKD	pulmonary_dz	HTN	HF	DM	liver_dz	any_malignancy	Hematologic_malignancy	Rhematic_Dz	number_of_underlying_Dz	previous abdominal surgery	ASA_score	Extraperitoneal_procedure	Peritoneal_Adhesion_index
4	1	3	8	1	11	2	58	56	-9	47	1	72	58	88	30	-14	16	96	96	91	-5	0	-5	14	14	0	33073852	49	2	1.618	59.1	22.5751	0	0	0	0	0	0	0	0	0	1	0	0	1	0	2	0	2
5	1	3	8	1	11	2	58	56	-9	47	1	72	58	88	30	-14	16	96	97	95	-2	1	-1	19	19	0	12682807	67	1	1.69	72	25.2092	0	0	0	0	0	0	0	0	0	1	0	0	1	0	2	0	20
5	2	4	5	1	30	92	65	-27	62	35	1	82	107	111	4	25	29	97	96	91	-5	-1	-6	15	12	-3	12682807	67	1	1.69	72	25.2092	0	0	0	0	0	0	0	0	0	1	0	0	1	0	2	0	20
6	1	3	8	1	11	2	58	56	-9	47	1	72	58	88	30	-14	16	96	91	93	2	-5	-3	19	22	3	33897455	60	1	1.6	69.5	27.1484	0	0	0	0	0	1	0	1	0	1	0	0	3	1	4	0	2
6	1	3	5	1	30	82	97	15	52	67	1	82	74	82	8	-8	0	97	99	94	-5	2	-3	20	15	-5	33897455	60	1	1.6	69.5	27.1484	0	0	0	0	0	1	0	1	0	1	0	0	3	1	4	0	2
6	1	3	3	1	13	48	20	-28	35	7	1	77	83	73	-10	6	-4	97	95	95	0	-2	-2	17	20	3	33897455	60	1	1.6	69.5	27.1484	0	0	0	0	0	1	0	1	0	1	0	0	3	1	4	0	2
7	1	1	5	1	30	92	65	-27	62	35	1	82	107	111	4	25	29	97	95	95	0	-2	-2	12	16	4	33843821	52	1	1.67	85.9	30.8007	0	0	0	0	0	1	0	0	0	0	0	0	1	0	2	0	0
8	2	4	6	2	16	89	38	-51	73	22	1	73	103	81	-22	30	8	99	99	99	0	0	0	14	12	-2	8862353	54	2	1.56	53.9	22.1483	1	0	0	0	0	0	0	0	0	0	0	0	0	0	2	0	3
9	1	4	6	1	30	92	65	-27	62	35	1	82	107	111	4	25	29	97	94	95	1	-3	-2	16	11	-5	9404568	87	2	1.56	58	23.833	0	1	0	0	0	1	0	0	0	0	0	0	2	0	3	0	2
10	2	4	5	1	30	92	65	-27	62	35	1	82	107	111	4	25	29	97	85	88	3	-12	-9	17	12	-5	22464721	65	2	1.6	69	26.9531	0	0	0	0	0	0	0	0	1	1	0	0	2	1	2	1	#NULL!
11	1	3	8	1	11	2	58	56	-9	47	1	72	58	88	30	-14	16	96	95	95	0	-1	-1	21	18	-3	32336690	69	2	1.7	69	23.8754	0	1	0	0	0	1	0	0	0	1	0	0	3	1	2	0	6
12	1	3	8	1	11	2	58	56	-9	47	1	72	58	88	30	-14	16	96	95	96	1	-1	0	35	15	-20	33672423	22	2	1.6	65	25.3906	1	0	0	0	0	0	0	0	0	0	0	0	0	0	1	1	#NULL!
13	1	4	5	1	30	92	65	-27	62	35	1	82	107	111	4	25	29	97	96	96	0	-1	-1	9	8	-1	33333011	67	1	1.52	60.55	26.2076	0	0	0	0	1	0	0	0	0	1	0	0	2	1	2	0	0
14	1	1	22	1	11	30	53	23	19	42	1	81	80	84	4	-1	3	97	99	92	-7	2	-5	6	13	7	33785074	84	1	1.67	64.5	23.1274	1	0	0	0	0	0	0	0	0	0	0	0	0	0	2	0	6
14	1	4	5	1	30	92	65	-27	62	35	1	82	107	111	4	25	29	97	94	90	-4	-3	-7	12	9	-3	33785074	84	1	1.67	64.5	23.1274	1	0	0	0	0	0	0	0	0	0	0	0	0	0	2	0	6
15	1	1	22	1	11	21	83	62	10	72	1	81	77	97	20	-4	16	97	97	99	2	0	2	7	13	6	33688864	57	2	1.51	58.4	25.6129	1	0	0	0	0	0	0	0	0	0	0	0	0	0	2	0	4
15	2	1	5	1	30	92	65	-27	62	35	1	82	107	111	4	25	29	97	91	95	4	-6	-2	11	14	3	33688864	57	2	1.51	58.4	25.6129	1	0	0	0	0	0	0	0	0	0	0	0	0	0	2	0	4
17	1	1	22	1	11	16	75	59	5	64	1	81	77	92	15	-4	11	97	98	97	-1	1	0	12	17	5	33843202	51	1	1.7	77.7	26.8858	1	0	0	0	0	0	0	0	0	0	0	0	0	0	1	0	15
17	2	4	5	1	30	92	65	-27	62	35	1	82	107	111	4	25	29	97	98	94	-4	1	-3	14	12	-2	33843202	51	1	1.7	77.7	26.8858	1	0	0	0	0	0	0	0	0	0	0	0	0	0	1	0	15
18	2	4	6	2	30	62	20	-42	32	-10	0	80	83	82	-1	3	2	97	97	93	-4	0	-4	18	12	-6	33859561	46	2	1.68	63.6	22.534	0	0	0	0	0	1	0	1	0	0	0	0	2	0	2	0	5
19	1	3	8	1	11	2	58	56	-9	47	1	72	58	88	30	-14	16	96	96	93	-3	0	-3	19	17	-2	33826720	48	1	1.83	81.3	24.2766	1	0	0	0	0	0	0	0	0	0	0	0	0	0	1	0	2
20	2	4	6	2	30	10	6	-4	-20	-24	0	80	71	68	-3	-9	-12	97	92	91	-1	-5	-6	13	11	-2	6021071	71	2	1.54	53.2	22.4321	0	0	0	0	0	1	0	0	0	0	0	1	2	1	2	0	4
21	1	4	5	1	30	92	65	-27	62	35	1	82	107	111	4	25	29	97	94	95	1	-3	-2	12	9	-3	10287419	58	2	1.53	56	23.9224	1	0	0	0	0	0	0	0	0	0	0	0	0	0	2	0	2
22	1	1	22	1	11	57	92	35	46	81	1	81	82	92	10	1	11	97	97	97	0	0	0	6	15	9	33604885	50	2	1.64	47.8	17.7722	1	0	0	0	0	0	0	0	0	0	0	0	0	0	1	0	3
23	1	1	22	1	11	69	79	10	58	68	1	81	89	96	7	8	15	97	92	92	0	-5	-5	9	13	4	33891234	72	2	1.49	49.2	22.1612	1	0	0	0	0	0	0	0	0	0	0	0	0	0	2	0	0
23	2	4	6	2	30	14	36	22	-16	6	1	80	72	82	10	-8	2	97	95	90	-5	-2	-7	12	14	2	33891234	72	2	1.49	49.2	22.1612	1	0	0	0	0	0	0	0	0	0	0	0	0	0	2	0	0
25	1	1	22	1	11	0	27	27	-11	16	1	81	67	76	9	-14	-5	97	95	100	5	-2	3	7	11	4	33911625	58	1	1.8	65.6	20.2469	1	0	0	0	0	0	0	0	0	0	0	0	0	0	2	0	2
27	1	3	8	1	11	12	5	-7	1	-6	0	72	79	94	15	7	22	96	96	95	-1	0	-1	20	12	-8	33897455	60	1	1.6	69.5	27.1484	0	0	0	0	0	1	0	1	0	1	0	0	3	1	4	0	18
27	2	5	3	2	24	57	12	-45	33	-12	0	62	90	81	-9	28	19	94	93	91	-2	-1	-3	19	13	-6	33897455	60	1	1.6	69.5	27.1484	0	0	0	0	0	1	0	1	0	1	0	0	3	1	4	0	18
28	1	1	29	1	41	40	63	23	-1	22	1	81	85	90	5	4	9	95	95	95	0	0	0	8	7	-1	33927954	30	1	1.8	85	26.2346	1	0	0	0	0	0	0	0	0	0	0	0	0	0	1	1	#NULL!
29	1	1	29	1	41	77	66	-11	36	25	1	81	103	100	-3	22	19	95	95	95	0	0	0	13	10	-3	32357743	61	1	1.6	60	23.4375	0	0	0	0	0	0	0	0	0	0	1	0	1	0	3	1	#NULL!
29	2	4	6	1	30	82	97	15	52	67	1	82	81	82	1	-1	0	97	95	95	0	-2	-2	11	10	-1	32357743	61	1	1.6	60	23.4375	0	0	0	0	0	0	0	0	0	0	1	0	1	0	3	1	#NULL!
33	3	5	4	1	33	84	83	-1	51	50	1	74	106	80	-26	32	6	95	99	99	0	4	4	16	14	-2	33846563	55	2	1.5	53	23.5556	1	0	0	0	0	0	0	0	0	0	0	0	0	0	1	0	0
33	2	4	6	2	30	56	5	-51	26	-25	0	80	80	80	0	0	0	97	93	90	-3	-4	-7	18	13	-5	33846563	55	2	1.5	53	23.5556	1	0	0	0	0	0	0	0	0	0	0	0	0	0	1	0	0
33	1	3	8	1	11	8	61	53	-3	50	1	72	71	88	17	-1	16	96	96	94	-2	0	-2	16	18	2	33846563	55	2	1.5	53	23.5556	1	0	0	0	0	0	0	0	0	0	0	0	0	0	1	0	0
34	1	4	5	1	30	36	24	-12	6	-6	0	82	80	87	7	-2	5	97	95	95	0	-2	-2	13	12	-1	33981512	40	1	1.7	59	20.4152	1	0	0	0	0	0	0	0	0	0	0	0	0	0	2	0	0
35	1	1	29	1	41	12	33	21	-29	-8	0	81	102	86	-16	21	5	95	95	95	0	0	0	8	11	3	33850815	63	1	1.7	66	22.8374	1	0	0	0	0	0	0	0	0	0	0	0	0	0	1	1	0
35	2	4	5	1	30	69	90	21	39	60	1	82	91	101	10	9	19	97	95	95	0	-2	-2	11	9	-2	33850815	63	1	1.7	66	22.8374	1	0	0	0	0	0	0	0	0	0	0	0	0	0	1	1	0
36	2	4	5	1	30	68	80	12	38	50	1	82	82	103	21	0	21	97	95	95	0	-2	-2	15	14	-1	33844353	67	1	1.7	61.6	21.3149	1	0	0	0	0	0	0	0	0	0	0	0	0	1	2	1	0
37	2	4	5	1	30	87	93	6	57	63	1	82	110	103	-7	28	21	97	95	95	0	-2	-2	14	12	-2	26203342	67	1	1.8	75	23.1481	1	0	0	0	0	0	0	0	0	0	0	0	0	0	2	1	0
38	2	4	5	1	30	31	75	44	1	45	1	82	89	90	1	7	8	95	95	95	0	0	0	15	15	0	30370862	33	1	1.7	60	20.7612	1	0	0	0	0	0	0	0	0	0	0	0	0	0	2	1	0
38	1	1	29	1	41	40	38	-2	-1	-3	0	81	92	94	2	11	13	97	95	95	0	-2	-2	14	9	-5	30370862	33	1	1.7	60	20.7612	1	0	0	0	0	0	0	0	0	0	0	0	0	0	2	1	0
39	2	4	5	1	30	30	36	6	0	6	1	82	96	83	-13	14	1	97	95	96	1	-2	-1	13	9	-4	8917685	65	1	1.6	68	26.5625	1	0	0	0	0	0	0	0	0	0	0	0	0	0	2	1	0
40	2	4	6	2	30	40	19	-21	10	-11	0	80	84	79	-5	4	-1	97	96	96	0	-1	-1	15	13	-2	33618586	54	1	1.7	72.8	25.1903	1	0	0	0	0	0	0	0	0	0	0	0	0	0	2	0	0
42	2	4	6	2	30	41	65	24	11	35	1	80	86	80	-6	6	0	97	97	96	-1	0	-1	15	12	-3	8117420	76	2	1.5	56	24.8889	1	0	0	0	0	0	0	0	0	0	0	0	0	1	2	0	8
42	3	5	3	2	24	48	56	8	24	32	1	62	86	78	-8	24	16	94	88	90	2	-6	-4	17	15	-2	8117420	76	2	1.5	56	24.8889	1	0	0	0	0	0	0	0	0	0	0	0	0	1	2	0	8
43	2	4	5	1	30	22	20	-2	-8	-10	0	82	75	78	3	-7	-4	97	98	96	-2	1	-1	10	6	-4	30306781	66	1	1.7	61	21.1073	1	0	0	0	0	0	0	0	0	0	0	0	0	0	1	1	#NULL!
44	2	4	6	2	30	57	45	-12	27	15	1	80	72	80	8	-8	0	97	94	91	-3	-3	-6	19	15	-4	32940662	38	2	1.5	54.8	24.3556	1	0	0	0	0	0	0	0	0	0	0	0	0	1	1	0	16
45	2	4	5	1	30	41	69	28	11	39	1	82	83	92	9	1	10	97	97	97	0	0	0	18	13	-5	34025454	0	2	0.5	3.35	13.4	1	0	0	0	0	0	0	0	0	0	0	0	0	0	2	0	0
45	3	5	4	1	33	80	73	-7	47	40	1	74	84	103	19	10	29	95	95	95	0	0	0	17	13	-4	34025454	0	2	0.5	3.35	13.4	1	0	0	0	0	0	0	0	0	0	0	0	0	0	2	0	0
46	2	4	9	1	62	64	61	-3	2	-1	0	91	93	74	-19	2	-17	95	98	99	1	3	4	9	8	-1	24158520	80	2	1.5	50.3	22.3556	0	0	0	0	0	0	1	0	0	0	0	0	1	0	2	0	5
48	2	4	6	2	30	11	15	4	-19	-15	0	80	80	72	-8	0	-8	97	96	90	-6	-1	-7	18	13	-5	33857564	65	1	1.7	74.1	25.6401	1	0	0	0	0	0	0	0	0	0	0	0	0	1	2	0	3
49	3	5	3	2	24	75	79	4	51	55	1	62	99	84	-15	37	22	94	93	92	-1	-1	-2	16	15	-1	33424466	72	2	1.6	58.9	23.0078	0	0	1	0	0	0	0	1	0	1	0	0	3	1	2	0	2
50	2	4	6	2	30	25	58	33	-5	28	1	80	78	83	5	-2	3	97	87	92	5	-10	-5	17	12	-5	33958324	52	1	1.7	56.8	19.654	1	0	0	0	0	0	0	0	0	0	0	0	0	0	2	0	2
51	2	4	9	1	62	71	54	-17	9	-8	0	91	103	73	-30	12	-18	95	97	98	1	2	3	13	9	-4	32556041	61	1	1.5	58.35	25.9333	0	0	0	0	0	0	0	0	0	1	0	0	1	1	1	0	4
52	2	4	9	1	62	52	75	23	-10	13	1	91	87	92	5	-4	1	95	96	91	-5	1	-4	6	10	4	34013474	48	1	1.6	64.95	25.3711	1	0	0	0	0	0	0	0	0	0	0	0	0	1	2	0	0
53	2	4	6	2	30	25	7	-18	-5	-23	0	80	78	60	-18	-2	-20	97	89	90	1	-8	-7	16	14	-2	17281186	77	1	1.6	52.1	20.3516	0	0	0	0	0	0	0	1	0	0	0	0	1	0	2	0	6
54	1	1	22	1	11	16	14	-2	5	3	1	81	74	70	-4	-7	-11	97	95	94	-1	-2	-3	15	21	6	27590971	27	2	1.6	43.1	16.8359	0	0	0	0	1	0	0	0	0	0	0	0	1	1	2	0	8
54	2	4	6	2	30	20	25	5	-10	-5	0	80	78	71	-7	-2	-9	97	100	95	-5	3	-2	18	13	-5	27590971	27	2	1.6	43.1	16.8359	0	0	0	0	1	0	0	0	0	0	0	0	1	1	2	0	8
55	2	4	6	2	30	40	2	-38	10	-28	0	80	78	68	-10	-2	-12	97	97	88	-9	0	-9	19	16	-3	23953864	51	2	1.6	51	19.9219	1	0	0	0	0	0	0	0	0	0	0	0	0	1	1	0	0
56	2	4	6	2	30	33	18	-15	3	-12	0	80	71	67	-4	-9	-13	97	91	83	-8	-6	-14	17	15	-2	34001553	67	2	1.5	52.75	23.4444	1	0	0	0	0	0	0	0	0	0	0	0	0	0	2	0	0
56	3	5	3	2	24	50	59	9	26	35	1	62	88	83	-5	26	21	94	90	88	-2	-4	-6	13	12	-1	34001553	67	2	1.5	52.75	23.4444	1	0	0	0	0	0	0	0	0	0	0	0	0	0	2	0	0
57	2	4	6	2	30	17	39	22	-13	9	1	80	105	77	-28	25	-3	97	81	93	12	-16	-4	18	11	-7	31478543	83	2	1.6	51	19.9219	0	0	0	0	1	0	0	0	0	0	0	0	1	0	2	0	3
58	1	1	22	1	11	52	30	-22	41	19	1	81	82	67	-15	1	-14	97	96	96	0	-1	-1	6	18	12	31146022	73	1	1.7	55.5	19.2042	0	0	0	0	0	1	0	0	0	0	0	0	1	1	2	0	26
58	3	5	3	2	24	42	79	37	18	55	1	62	79	90	11	17	28	94	90	88	-2	-4	-6	17	16	-1	31146022	73	1	1.7	55.5	19.2042	0	0	0	0	0	1	0	0	0	0	0	0	1	1	2	0	26
59	1	1	22	1	11	57	28	-29	46	17	1	81	84	86	2	3	5	97	89	96	7	-8	-1	#NULL!	#NULL!	#NULL!	12705410	78	1	1.6	49.5	19.3359	0	0	0	0	1	1	0	0	0	0	0	0	2	1	2	0	0
59	2	4	6	2	30	8	8	0	-22	-22	0	80	69	63	-6	-11	-17	97	91	96	5	-6	-1	14	11	-3	12705410	78	1	1.6	49.5	19.3359	0	0	0	0	1	1	0	0	0	0	0	0	2	1	2	0	0
60	2	4	6	2	30	22	8	-14	-8	-22	0	80	75	66	-9	-5	-14	97	96	99	3	-1	2	12	12	0	34026632	37	2	1.7	63.9	22.1107	1	0	0	0	0	0	0	0	0	0	0	0	0	0	1	0	0
61	1	4	6	2	30	13	44	31	-17	14	1	80	67	73	6	-13	-7	97	97	93	-4	0	-4	15	12	-3	32857853	62	1	1.7	65	22.4913	0	0	0	0	0	0	0	0	1	0	0	0	1	1	2	0	1
62	2	4	5	1	30	24	41	17	-6	11	1	82	87	80	-7	5	-2	97	96	96	0	-1	-1	18	14	-4	34031253	73	1	1.6	43	16.7969	0	0	0	0	1	0	0	0	1	0	0	0	2	0	2	0	10
63	2	4	5	1	30	49	24	-25	19	-6	0	82	96	80	-16	14	-2	97	96	99	3	-1	2	9	7	-2	34028421	21	2	1.75	76	24.8163	1	0	0	0	0	0	0	0	0	0	0	0	0	1	1	0	0
64	2	4	5	1	30	45	53	8	15	23	1	82	82	92	10	0	10	97	96	96	0	-1	-1	13	11	-2	6085829	71	1	1.67	68	24.3824	0	0	0	0	0	0	1	0	1	0	0	0	2	0	2	1	#NULL!
65	1	1	22	1	11	17	74	57	6	63	1	81	71	94	23	-10	13	97	91	94	3	-6	-3	6	7	1	34067976	52	2	1.54	47.1	19.86	1	0	0	0	0	0	0	0	0	0	0	0	0	0	2	0	3
65	2	4	6	2	30	12	14	2	-18	-16	0	80	61	74	13	-19	-6	97	96	91	-5	-1	-6	18	12	-6	34067976	52	2	1.54	47.1	19.86	1	0	0	0	0	0	0	0	0	0	0	0	0	0	2	0	3
66	1	1	22	1	11	50	77	27	39	66	1	81	85	88	3	4	7	97	97	95	-2	0	-2	6	6	0	23511764	72	2	1.48	34.2	15.6136	0	0	0	0	0	1	1	1	0	1	0	0	4	1	3	0	2
66	2	4	6	2	30	57	17	-40	27	-13	0	80	74	66	-8	-6	-14	97	92	99	7	-5	2	16	12	-4	23511764	72	2	1.48	34.2	15.6136	0	0	0	0	0	1	1	1	0	1	0	0	4	1	3	0	2
67	1	3	8	1	11	17	11	-6	6	0	0	72	79	61	-18	7	-11	96	95	97	2	-1	1	9	11	2	33617640	45	1	1.73	65	21.7181	0	0	0	0	0	0	0	0	0	1	0	0	1	0	2	1	#NULL!
68	1	3	8	1	11	13	8	-5	2	-3	0	72	73	66	-7	1	-6	96	93	96	3	-3	0	14	12	-2	18965695	76	1	1.62	60	22.8624	0	0	1	0	0	0	0	1	0	1	0	0	3	1	3	0	0
69	1	3	8	1	11	15	1	-14	4	-10	0	72	69	64	-5	-3	-8	96	96	91	-5	0	-5	10	11	1	8214021	29	1	1.8	85	26.2346	1	0	0	0	0	0	0	0	0	0	0	0	0	0	1	1	#NULL!
70	2	4	6	2	30	39	39	0	9	9	1	80	78	88	10	-2	8	97	97	78	-19	0	-19	17	16	-1	24419331	37	2	1.6	58.3	22.7734	0	0	0	0	0	0	0	0	0	1	0	0	1	0	2	0	0
71	2	4	6	2	30	39	13	-26	9	-17	0	80	82	73	-9	2	-7	97	86	92	6	-11	-5	20	17	-3	33657190	51	1	1.68	52.7	18.6721	0	0	0	0	1	0	0	0	0	0	0	0	1	0	1	0	6
72	1	4	5	1	30	63	82	19	33	52	1	82	92	100	8	10	18	97	96	96	0	-1	-1	15	14	-1	30687946	55	2	1.58	66.2	26.5182	0	0	0	0	0	0	0	0	0	1	0	0	0	0	2	0	3
74	1	1	22	1	11	10	57	47	-1	46	1	81	70	88	18	-11	7	97	97	95	-2	0	-2	6	10	4	34056163	47	1	1.765	74.85	24.0272	1	0	0	0	0	0	0	0	0	0	0	0	0	0	2	0	4
74	2	4	6	2	30	37	36	-1	7	6	1	80	73	74	1	-7	-6	97	90	90	0	-7	-7	18	14	-4	34056163	47	1	1.765	74.85	24.0272	1	0	0	0	0	0	0	0	0	0	0	0	0	0	2	0	4
75	2	4	9	1	62	69	79	10	7	17	1	91	86	86	0	-5	-5	95	97	97	0	2	2	7	10	3	4154130	41	2	1.52	66.1	28.6098	1	0	0	0	0	0	0	0	0	0	0	0	0	1	1	0	1
76	1	5	3	1	13	8	24	16	-5	11	1	77	78	74	-4	1	-3	97	96	97	1	-1	0	12	12	0	26991920	34	2	1.54	49	20.6612	1	0	0	0	0	0	0	0	0	0	0	0	0	1	1	0	2
77	1	4	5	1	30	94	90	-4	64	60	1	82	110	95	-15	28	13	97	96	96	0	-1	-1	13	7	-6	31359963	14	1	1.7	66	22.8374	1	0	0	0	0	0	0	0	0	0	0	0	0	1	1	0	0
78	1	3	8	1	11	8	7	-1	-3	-4	0	72	86	54	-32	14	-18	96	96	96	0	0	0	19	14	-5	18823072	77	1	1.7	60.3	20.8651	0	0	0	0	1	0	0	0	0	1	0	0	2	1	2	1	#NULL!
79	2	4	6	2	30	15	15	0	-15	-15	0	80	69	70	1	-11	-10	97	87	91	4	-10	-6	14	13	-1	33202612	61	1	1.64	73.3	27.2531	0	0	0	0	0	0	0	0	1	1	0	0	2	1	2	0	2
80	1	1	22	1	11	50	77	27	39	66	1	81	80	84	4	-1	3	97	98	98	0	1	1	6	11	5	17398975	48	2	1.58	48	19.2277	0	0	0	0	1	0	0	0	0	1	0	0	2	1	2	0	4
80	2	4	6	2	30	17	7	-10	-13	-23	0	80	72	72	0	-8	-8	97	92	88	-4	-5	-9	17	16	-1	17398975	48	2	1.58	48	19.2277	0	0	0	0	1	0	0	0	0	1	0	0	2	1	2	0	4
80	3	5	3	2	24	78	64	-14	54	40	1	62	88	73	-15	26	11	94	95	92	-3	1	-2	16	14	-2	17398975	48	2	1.58	48	19.2277	0	0	0	0	1	0	0	0	0	1	0	0	2	1	2	0	4
81	2	4	5	1	30	43	75	32	13	45	1	82	100	97	-3	18	15	97	96	96	0	-1	-1	16	12	-4	15609382	73	2	1.46	78	36.5922	0	0	0	0	1	0	0	0	0	0	0	0	1	1	2	1	4
82	2	4	9	1	62	58	63	5	-4	1	1	91	92	82	-10	1	-9	95	97	98	1	2	3	15	11	-4	34032611	80	2	1.48	62.6	28.5793	0	0	0	0	1	0	1	0	0	0	0	1	2	1	2	0	0
83	1	3	8	1	11	7	63	56	-4	52	1	72	75	93	18	3	21	96	90	98	8	-6	2	17	15	-2	33366052	61	2	1.53	36	15.3787	0	1	0	0	0	1	1	1	0	0	0	0	4	0	2	0	0
84	2	4	6	2	30	17	19	2	-13	-11	0	80	73	80	7	-7	0	97	93	79	-14	-4	-18	20	16	-4	9644770	83	2	1.56	55.1	22.6414	1	0	0	0	0	0	0	0	0	0	0	0	0	1	2	0	6
85	1	1	22	1	11	78	63	-15	67	52	1	81	96	93	-3	15	12	97	99	91	-8	2	-6	19	8	-11	32331326	41	2	1.61	58	22.3757	0	0	0	0	0	0	0	0	0	1	0	0	1	1	2	0	5
85	2	4	6	2	30	24	20	-4	-6	-10	0	80	70	76	6	-10	-4	97	95	92	-3	-2	-5	21	17	-4	32331326	41	2	1.61	58	22.3757	0	0	0	0	0	0	0	0	0	1	0	0	1	1	2	0	5
85	3	5	3	2	24	30	27	-3	6	3	1	62	78	83	5	16	21	94	91	88	-3	-3	-6	17	13	-4	32331326	41	2	1.61	58	22.3757	0	0	0	0	0	0	0	0	0	1	0	0	1	1	2	0	5
86	2	4	9	1	62	35	71	36	-27	9	1	91	85	97	12	-6	6	95	98	97	-1	3	2	9	12	3	31189581	63	1	1.75	61.1	19.951	0	0	0	0	0	1	0	1	0	1	0	0	3	1	2	1	#NULL!
87	1	3	8	1	11	18	24	6	7	13	1	72	88	77	-11	16	5	96	97	97	0	1	1	16	14	-2	11803962	77	2	1.55	59	24.5578	0	1	0	0	0	0	0	0	0	1	0	0	2	0	2	0	1
88	1	1	22	1	11	40	65	25	29	54	1	81	74	88	14	-7	7	97	98	97	-1	1	0	6	13	7	34087431	63	1	1.73	65.35	21.835	0	0	0	0	0	1	0	1	0	0	0	0	2	1	2	0	2
88	2	4	6	2	30	51	28	-23	21	-2	0	80	78	70	-8	-2	-10	97	81	95	14	-16	-2	16	13	-3	34087431	63	1	1.73	65.35	21.835	0	0	0	0	0	1	0	1	0	0	0	0	2	1	2	0	2
89	2	4	6	2	30	18	24	6	-12	-6	0	80	72	68	-4	-8	-12	97	87	93	6	-10	-4	14	11	-3	33654321	61	1	1.67	60	21.5139	0	0	1	0	0	1	0	1	0	0	0	0	3	0	3	0	2
90	2	4	9	1	62	62	78	16	0	16	1	91	86	83	-3	-5	-8	95	97	96	-1	2	1	9	14	5	34099432	70	2	1.51	51.9	22.7622	1	0	0	0	0	0	0	0	0	0	0	0	0	0	2	0	0
91	2	4	9	1	62	80	70	-10	18	8	1	91	93	86	-7	2	-5	95	96	95	-1	1	0	11	12	1	33839952	53	2	1.56	36.7	15.0805	1	0	0	0	0	0	0	0	0	0	0	0	0	1	2	0	6
92	1	1	22	1	11	51	71	20	40	60	1	81	94	95	1	13	14	97	98	98	0	1	1	6	10	4	29958273	79	1	1.565	73	29.8053	0	0	0	0	0	1	0	0	0	0	0	0	1	1	2	0	2
92	2	4	6	2	30	78	48	-30	48	18	1	80	102	78	-24	22	-2	97	92	83	-9	-5	-14	17	16	-1	29958273	79	1	1.565	73	29.8053	0	0	0	0	0	1	0	0	0	0	0	0	1	1	2	0	2
93	1	1	22	1	11	78	41	-37	67	30	1	81	94	82	-12	13	1	97	93	96	3	-4	-1	8	8	0	34142471	59	2	1.623	53.85	20.4432	1	0	0	0	0	0	0	0	0	0	0	0	0	0	1	0	0
93	2	4	6	2	30	31	48	17	1	18	1	80	80	82	2	0	2	97	90	92	2	-7	-5	16	15	-1	34142471	59	2	1.623	53.85	20.4432	1	0	0	0	0	0	0	0	0	0	0	0	0	0	1	0	0
94	1	1	22	1	11	46	30	-16	35	19	1	81	76	79	3	-5	-2	97	90	95	5	-7	-2	6	8	2	33264086	48	2	1.636	54.5	20.3624	1	0	0	0	0	0	0	0	0	0	0	0	0	0	1	0	0
95	2	4	6	2	30	48	46	-2	18	16	1	80	92	72	-20	12	-8	97	89	93	4	-8	-4	14	15	1	34139242	54	2	1.61	59.05	22.7808	1	0	0	0	0	0	0	0	0	0	0	0	0	0	1	0	7
96	1	1	22	1	11	70	74	4	59	63	1	81	89	87	-2	8	6	97	97	96	-1	0	-1	9	10	1	30828196	67	1	1.71	73.3	25.0675	0	0	1	0	0	1	0	1	0	0	1	0	4	1	3	0	7
96	2	4	6	2	30	50	16	-34	20	-14	0	80	76	78	2	-4	-2	97	93	100	7	-4	3	20	12	-8	30828196	67	1	1.71	73.3	25.0675	0	0	1	0	0	1	0	1	0	0	1	0	4	1	3	0	7
97	2	4	6	2	30	45	22	-23	15	-8	0	80	78	71	-7	-2	-9	97	96	96	0	-1	-1	17	14	-3	32935874	63	2	1.58	67	26.8386	0	0	0	0	0	0	0	0	0	1	0	0	1	1	2	1	#NULL!
98	2	4	6	2	30	57	27	-30	27	-3	0	80	77	74	-3	-3	-6	97	94	93	-1	-3	-4	17	19	2	34140065	58	1	1.68	63	22.3214	1	0	0	0	0	0	0	0	0	0	0	0	0	0	2	0	0
99	2	4	5	1	30	66	77	11	36	47	1	82	81	92	11	-1	10	97	96	96	0	-1	-1	12	9	-3	34124731	87	2	1.366	53.05	28.4305	1	0	0	0	0	0	0	0	0	0	0	0	0	0	2	0	7
101	2	4	5	1	30	84	89	5	54	59	1	82	91	100	9	9	18	97	96	96	0	-1	-1	18	12	-6	34122361	62	1	1.625	64.5	24.426	0	1	0	0	0	1	0	1	0	0	0	0	3	0	2	0	4
102	1	4	5	1	30	56	34	-22	26	4	1	82	84	82	-2	2	0	97	96	96	0	-1	-1	17	12	-5	34196311	7	1	1.2	27	18.75	1	0	0	0	0	0	0	0	0	0	0	0	0	0	2	0	3
103	1	3	8	1	11	3	6	3	-8	-5	0	72	64	67	3	-8	-5	96	95	95	0	-1	-1	16	17	1	11302903	74	1	1.66	58	21.048	0	0	0	0	0	0	0	0	1	0	0	0	1	1	2	0	11
104	2	4	5	1	30	78	59	-19	48	29	1	82	83	30	-53	1	-52	97	96	96	0	-1	-1	15	8	-7	25406122	20	1	1.7	92	31.8339	1	0	0	0	0	0	0	0	0	0	0	0	0	0	2	0	0
105	2	4	5	1	30	23	58	35	-7	28	1	82	77	83	6	-5	1	97	96	96	0	-1	-1	17	9	-8	33035996	67	2	1.549	47.9	19.9633	0	0	0	0	0	0	0	0	0	1	0	0	1	1	2	0	2
106	2	4	5	1	30	48	82	34	18	52	1	82	82	96	14	0	14	97	96	96	0	-1	-1	17	10	-7	16711504	74	1	1.7	70	24.2215	1	0	0	0	0	0	0	0	0	0	0	0	0	0	2	1	#NULL!
107	1	3	8	1	11	15	21	6	4	10	1	72	68	71	3	-4	-1	96	96	95	-1	0	-1	16	16	0	33031473	68	1	1.59	74.35	29.4094	0	0	0	0	0	1	0	0	1	1	0	0	3	1	2	0	1
108	1	3	8	1	11	68	24	-44	57	13	1	72	95	84	-11	23	12	96	98	96	-2	2	0	22	11	-11	14449589	79	2	1.53	53.1	22.6836	0	0	0	0	0	1	0	1	0	0	0	0	2	0	2	1	0
109	1	3	8	1	11	29	39	10	18	28	1	72	79	87	8	7	15	96	98	94	-4	2	-2	20	23	3	21033700	60	2	1.564	55.3	22.6075	0	0	0	0	0	1	0	0	0	1	0	0	2	1	2	0	2
110	1	3	8	1	11	25	28	3	14	17	1	72	76	77	1	4	5	96	97	95	-2	1	-1	17	15	-2	34048471	23	2	1.6	56	21.875	1	0	0	0	0	0	0	0	0	0	0	0	0	0	1	1	#NULL!
111	2	4	6	2	30	19	20	1	-11	-10	0	80	76	89	13	-4	9	97	96	90	-6	-1	-7	18	17	-1	34133162	72	1	1.65	65.2	23.9486	0	1	0	0	0	0	0	0	0	0	0	0	1	0	2	0	0
112	1	1	22	1	11	52	62	10	41	51	1	81	89	85	-4	8	4	97	96	97	1	-1	0	7	13	6	29059140	58	2	1.61	61	23.533	0	0	0	0	0	0	0	0	0	1	0	0	1	1	1	0	5
113	2	4	5	1	30	73	87	14	43	57	1	82	94	95	1	12	13	97	96	94	-2	-1	-3	11	7	-4	25302462	58	1	1.69	65	22.7583	0	0	0	1	0	0	0	0	0	0	0	0	1	1	2	1	#NULL!
114	2	4	5	1	30	73	84	11	43	54	1	82	96	103	7	14	21	97	96	94	-2	-1	-3	15	9	-6	32476486	74	2	1.56	68	27.9421	0	0	0	0	1	1	0	0	0	0	0	0	2	1	2	1	#NULL!
115	2	4	5	1	30	76	69	-7	46	39	1	82	92	86	-6	10	4	97	96	96	0	-1	-1	14	6	-8	30809762	78	1	1.65	63	23.1405	0	0	0	0	0	0	0	0	0	0	1	0	1	1	2	1	#NULL!
115	3	5	3	1	54	48	60	12	-6	6	1	80	80	85	5	0	5	96	98	98	0	2	2	16	13	-3	30809762	78	1	1.65	63	23.1405	0	0	0	0	0	0	0	0	0	0	1	0	1	1	2	1	#NULL!
116	1	1	22	1	11	45	83	38	34	72	1	81	82	95	13	1	14	97	97	97	0	0	0	6	10	4	34214374	64	1	1.71	57.1	19.5274	0	0	0	0	0	0	0	0	0	1	0	0	1	1	2	0	13
116	2	4	6	2	30	45	60	15	15	30	1	80	74	84	10	-6	4	97	96	96	0	-1	-1	18	12	-6	34214374	64	1	1.71	57.1	19.5274	0	0	0	0	0	0	0	0	0	1	0	0	1	1	2	0	13
117	2	4	6	2	30	25	20	-5	-5	-10	0	80	75	70	-5	-5	-10	97	97	92	-5	0	-5	18	17	-1	34160246	65	1	1.72	79.25	26.7881	0	0	0	0	0	1	0	1	0	0	0	0	2	0	2	0	0
118	1	1	22	1	11	51	90	39	40	79	1	81	103	101	-2	22	20	97	99	97	-2	2	0	8	9	1	14186423	77	1	1.58	52.4	20.9902	0	0	0	0	0	1	0	0	0	0	0	0	1	0	2	0	4
118	2	4	6	2	30	34	56	22	4	26	1	80	80	88	8	0	8	97	90	91	1	-7	-6	18	16	-2	14186423	77	1	1.58	52.4	20.9902	0	0	0	0	0	1	0	0	0	0	0	0	1	0	2	0	4
119	1	3	8	1	11	4	15	11	-7	4	1	72	65	63	-2	-7	-9	96	98	93	-5	2	-3	9	18	9	9540050	72	1	1.75	65	21.2245	1	0	0	0	0	0	0	0	0	0	0	0	0	0	2	0	4
120	1	4	5	1	30	76	75	-1	46	45	1	82	80	78	-2	-2	-4	97	96	96	0	-1	-1	20	6	-14	26273423	59	2	1.58	59	23.634	0	0	0	1	0	0	0	0	0	0	0	0	1	1	2	1	#NULL!
121	1	1	22	1	11	51	79	28	40	68	1	81	86	94	8	5	13	97	97	92	-5	0	-5	6	15	9	34217115	74	2	1.534	57.7	24.5203	0	0	0	0	0	1	0	0	0	0	0	0	1	0	2	0	3
122	1	1	22	1	11	70	85	15	59	74	1	81	87	89	2	6	8	97	97	96	-1	0	-1	8	15	7	34169410	63	1	1.63	77	28.9811	0	0	0	0	0	0	0	0	0	0	1	0	1	0	2	0	14
122	2	4	6	2	30	40	33	-7	10	3	1	80	80	75	-5	0	-5	97	94	95	1	-3	-2	16	20	4	34169410	63	1	1.63	77	28.9811	0	0	0	0	0	0	0	0	0	0	1	0	1	0	2	0	14
123	1	4	5	1	30	70	74	4	40	44	1	82	98	88	-10	16	6	97	95	96	1	-2	-1	16	6	-10	15138387	69	1	1.65	79	29.0174	0	0	0	0	0	1	0	1	0	0	0	0	2	0	2	0	3
124	1	1	22	1	11	31	75	44	20	64	1	81	85	94	9	4	13	97	93	95	2	-4	-2	6	15	9	34231141	64	1	1.65	68.9	25.3076	0	0	0	0	0	1	0	1	0	0	0	0	2	1	2	0	0
124	2	4	6	2	30	19	27	8	-11	-3	0	80	75	75	0	-5	-5	97	91	94	3	-6	-3	20	15	-5	34231141	64	1	1.65	68.9	25.3076	0	0	0	0	0	1	0	1	0	0	0	0	2	1	2	0	0
125	2	4	5	1	30	66	81	15	36	51	1	82	89	94	5	7	12	97	96	96	0	-1	-1	15	7	-8	34258771	32	1	1.7	83.5	28.8927	1	0	0	0	0	0	0	0	0	0	0	0	0	0	2	1	#NULL!
126	2	4	5	1	30	45	78	33	15	48	1	82	82	87	5	0	5	97	98	96	-2	1	-1	17	12	-5	25808423	74	2	1.542	54.5	22.9207	0	1	0	0	0	1	0	0	0	1	0	0	3	1	2	0	3
127	1	1	22	1	11	54	87	33	43	76	1	81	90	95	5	9	14	97	97	98	1	0	1	6	12	6	34235300	71	2	1.57	70.7	28.6827	0	0	0	0	0	1	0	0	0	0	0	0	1	1	2	0	10
128	1	1	22	1	11	44	74	30	33	63	1	81	83	87	4	2	6	97	97	95	-2	0	-2	6	10	4	31984061	59	2	1.598	50.6	19.8151	1	0	0	0	0	0	0	0	0	0	0	0	0	1	2	0	3
129	1	1	22	1	11	53	66	13	42	55	1	81	86	97	11	5	16	97	97	94	-3	0	-3	6	13	7	6742534	70	2	1.564	57.8	23.6295	1	0	0	0	0	0	0	0	0	0	0	0	0	1	2	0	0
130	1	1	22	1	11	38	79	41	27	68	1	81	85	92	7	4	11	97	97	97	0	0	0	8	9	1	34244312	47	2	1.54	51	21.5045	1	0	0	0	0	0	0	0	0	0	0	0	0	1	2	0	3
131	2	4	5	1	30	78	74	-4	48	44	1	82	97	87	-10	15	5	97	96	95	-1	-1	-2	17	7	-10	9074687	89	2	1.5	64	28.4444	0	0	0	0	0	0	0	0	0	1	0	0	1	1	3	0	3
132	1	1	22	1	11	43	78	35	32	67	1	81	87	91	4	6	10	97	97	96	-1	0	-1	7	12	5	34264044	54	2	1.564	51.85	21.197	0	0	1	0	0	0	0	0	0	1	0	0	2	0	2	0	4
133	2	4	5	1	30	68	82	14	38	52	1	82	87	88	1	5	6	97	98	100	2	1	3	14	6	-8	8643348	80	1	1.67	63	22.5896	0	0	0	0	0	1	0	0	0	0	0	0	1	0	2	1	0
134	2	4	6	2	30	50	14	-36	20	-16	0	80	80	70	-10	0	-10	97	87	95	8	-10	-2	15	14	-1	34229205	42	2	1.643	64.7	23.9679	1	0	0	0	0	0	0	0	0	0	0	0	0	0	1	0	0
134	1	1	22	1	11	45	36	-9	34	25	1	81	87	77	-10	6	-4	97	97	97	0	0	0	6	6	0	34229205	42	2	1.643	64.7	23.9679	1	0	0	0	0	0	0	0	0	0	0	0	0	0	1	0	0
135	1	1	22	1	11	45	72	27	34	61	1	81	85	89	4	4	8	97	97	97	0	0	0	6	6	0	32634010	49	2	1.595	63.75	25.0587	0	0	0	0	0	0	0	0	1	0	0	0	1	0	2	1	#NULL!
136	1	1	22	1	11	20	63	43	9	52	1	81	65	80	15	-16	-1	97	98	98	0	1	1	6	10	4	22551700	54	2	1.65	72	26.4463	1	0	0	0	0	0	0	0	0	0	0	0	0	0	2	0	6
137	2	4	5	1	30	71	30	-41	41	0	0	82	99	84	-15	17	2	97	96	96	0	-1	-1	21	6	-15	34264014	41	2	1.607	58.9	22.8078	1	0	0	0	0	0	0	0	0	0	0	0	0	0	2	0	2
138	2	4	6	2	30	11	29	18	-19	-1	0	80	65	70	5	-15	-10	97	86	91	5	-11	-6	16	13	-3	21702593	61	2	1.607	64.15	24.8408	0	0	0	0	0	1	0	0	0	0	0	0	1	1	2	0	4
138	1	1	22	1	11	32	58	26	21	47	1	81	87	85	-2	6	4	97	97	98	1	0	1	6	10	4	21702593	61	2	1.607	64.15	24.8408	0	0	0	0	0	1	0	0	0	0	0	0	1	1	2	0	4
139	2	5	3	1	54	30	60	30	-24	6	1	80	80	85	5	0	5	96	98	98	0	2	2	11	19	8	34306752	52	1	1.607	64.15	24.8408	0	0	0	0	0	1	0	1	0	0	0	0	2	1	2	0	0
139	1	3	8	1	11	49	40	-9	38	29	1	72	80	77	-3	8	5	96	96	91	-5	0	-5	16	10	-6	34306752	52	1	1.607	64.15	24.8408	0	0	0	0	0	1	0	1	0	0	0	0	2	1	2	0	0
140	1	3	8	1	11	15	20	5	4	9	1	72	73	72	-1	1	0	96	95	94	-1	-1	-2	11	19	8	12933030	44	2	1.18	46.48	33.3812	0	0	0	0	0	0	0	0	1	0	0	0	1	0	3	0	4
141	2	4	9	1	62	94	86	-8	32	24	1	91	107	92	-15	16	1	95	98	79	-19	3	-16	7	6	-1	34247343	68	2	1.5	45	20	0	0	0	0	0	0	0	0	0	1	0	0	1	1	1	0	10
142	2	4	9	1	62	89	63	-26	27	1	1	91	104	88	-16	13	-3	95	99	99	0	4	4	8	8	0	19556353	61	2	1.596	52.6	20.65	0	0	0	0	0	0	0	1	0	0	0	0	1	0	2	0	0
143	2	4	6	2	30	13	21	8	-17	-9	0	80	77	77	0	-3	-3	97	93	91	-2	-4	-6	18	15	-3	12712380	79	1	1.5	42.52	18.8978	0	1	1	0	0	1	0	1	0	0	0	0	4	0	3	0	0
143	1	1	22	1	11	9	17	8	-2	6	1	81	73	78	5	-8	-3	97	97	97	0	0	0	6	6	0	12712380	79	1	1.5	42.52	18.8978	0	1	1	0	0	1	0	1	0	0	0	0	4	0	3	0	0
144	2	4	6	2	30	27	39	12	-3	9	1	80	78	78	0	-2	-2	97	89	95	6	-8	-2	16	12	-4	12848501	52	1	1.67	72.65	26.0497	1	0	0	0	0	0	0	0	0	0	0	0	0	0	1	0	1
144	1	1	22	1	11	59	74	15	48	63	1	81	90	94	4	9	13	97	96	97	1	-1	0	6	8	2	12848501	52	1	1.67	72.65	26.0497	1	0	0	0	0	0	0	0	0	0	0	0	0	0	1	0	1
145	2	4	6	2	30	17	9	-8	-13	-21	0	80	73	69	-4	-7	-11	97	84	94	10	-13	-3	17	12	-5	14288530	60	2	1.559	51.4	21.1481	0	0	0	0	0	0	0	0	0	1	0	0	1	1	1	0	5
145	1	1	22	1	11	50	39	-11	39	28	1	81	88	83	-5	7	2	97	97	97	0	0	0	6	6	0	14288530	60	2	1.559	51.4	21.1481	0	0	0	0	0	0	0	0	0	1	0	0	1	1	1	0	5
146	1	3	8	1	11	21	13	-8	10	2	1	72	67	72	5	-5	0	96	95	97	2	-1	1	17	15	-2	12899000	64	1	1.73	79	26.3958	0	0	0	0	0	0	0	0	0	1	0	0	1	1	2	0	12
147	2	4	9	1	62	71	77	6	9	15	1	91	83	99	16	-8	8	95	98	98	0	3	3	9	10	1	16121858	84	2	1.53	64.8	27.6817	0	0	0	0	0	1	0	0	0	1	0	0	2	0	2	0	2
148	2	4	9	1	62	59	75	16	-3	13	1	91	82	86	4	-9	-5	95	98	99	1	3	4	10	11	1	29999913	90	1	1.694	66.6	23.2085	0	0	1	0	0	1	0	0	0	1	0	0	3	0	2	0	0
149	2	4	5	1	30	78	69	-9	48	39	1	82	99	101	2	17	19	97	96	96	0	-1	-1	20	14	-6	34345705	35	2	1.58	67	26.8386	1	0	0	0	0	0	0	0	0	0	0	0	0	0	2	0	12
150	2	4	9	1	62	78	59	-19	16	-3	0	91	108	87	-21	17	-4	95	97	98	1	2	3	10	8	-2	19108994	62	2	1.627	72.45	27.3693	0	0	0	0	0	1	0	0	0	1	0	0	2	1	2	0	6
150	1	1	22	1	11	12	70	58	1	59	1	81	86	86	0	5	5	97	95	98	3	-2	1	6	10	4	19108994	62	2	1.627	72.45	27.3693	0	0	0	0	0	1	0	0	0	1	0	0	2	1	2	0	6
151	2	4	9	1	62	52	60	8	-10	-2	0	91	87	87	0	-4	-4	95	96	98	2	1	3	8	8	0	34235071	46	1	1.832	82.1	24.462	0	0	0	0	0	0	0	0	0	1	0	0	1	1	2	0	3
151	1	1	22	1	11	40	97	57	29	86	1	81	88	87	-1	7	6	97	96	98	2	-1	1	8	8	0	34235071	46	1	1.832	82.1	24.462	0	0	0	0	0	0	0	0	0	1	0	0	1	1	2	0	3
152	2	4	9	1	62	80	66	-14	18	4	1	91	88	117	29	-3	26	95	97	97	0	2	2	6	9	3	34266791	41	2	1.578	48.9	19.6379	1	0	0	0	0	0	0	0	0	0	0	0	0	0	2	1	#NULL!
152	1	1	22	1	11	10	23	13	-1	12	1	81	74	78	4	-7	-3	97	94	95	1	-3	-2	9	6	-3	34266791	41	2	1.578	48.9	19.6379	1	0	0	0	0	0	0	0	0	0	0	0	0	0	2	1	#NULL!
153	2	4	9	1	62	60	23	-37	-2	-39	0	91	98	80	-18	7	-11	95	96	98	2	1	3	15	6	-9	26099783	81	1	1.6	45.5	17.7734	0	0	1	1	0	0	0	0	0	0	0	0	2	0	3	0	0
153	1	1	22	1	11	62	42	-20	51	31	1	81	86	84	-2	5	3	97	95	97	2	-2	0	7	10	3	26099783	81	1	1.6	45.5	17.7734	0	0	1	1	0	0	0	0	0	0	0	0	2	0	3	0	0
154	2	4	5	1	30	77	89	12	47	59	1	82	93	98	5	11	16	97	96	96	0	-1	-1	21	9	-12	30108684	54	2	1.563	63.1	25.8292	0	0	0	0	0	1	0	0	0	1	0	0	2	1	2	0	6
155	3	4	5	1	30	43	58	15	13	28	1	82	80	70	-10	-2	-12	97	96	96	0	-1	-1	18	14	-4	34296665	83	1	1.591	62.25	24.5923	0	0	0	0	1	1	0	0	0	0	0	0	2	1	2	0	8
158	1	1	22	1	11	45	75	30	34	64	1	81	93	92	-1	12	11	97	97	97	0	0	0	6	18	12	34274754	63	1	1.608	62	23.9784	0	0	1	0	0	0	0	0	0	1	0	0	2	0	3	0	6
159	1	1	22	1	11	50	30	-20	39	19	1	81	88	79	-9	7	-2	97	97	97	0	0	0	6	10	4	18192732	60	2	1.62	74.8	28.5018	0	0	0	0	0	1	0	1	0	0	0	0	2	0	2	0	0
159	2	4	9	1	62	79	21	-58	17	-41	0	91	99	60	-39	8	-31	95	98	97	-1	3	2	8	7	-1	18192732	60	2	1.62	74.8	28.5018	0	0	0	0	0	1	0	1	0	0	0	0	2	0	2	0	0
160	1	1	22	1	11	80	91	11	69	80	1	81	90	103	13	9	22	97	97	97	0	0	0	6	15	9	34281760	64	2	1.496	63.6	28.418	0	0	0	0	1	0	0	0	0	0	0	0	1	0	2	0	0
161	2	4	9	1	62	63	79	16	1	17	1	91	85	93	8	-6	2	95	98	97	-1	3	2	8	6	-2	34274754	63	1	1.608	62	23.9784	0	0	1	0	0	0	0	0	0	0	0	0	1	0	3	0	6
162	1	3	8	1	11	5	10	5	-6	-1	0	72	56	62	6	-16	-10	96	92	97	5	-4	1	12	12	0	10882451	53	2	1.58	62	24.8358	1	0	0	0	0	0	0	0	0	0	0	0	0	1	1	0	1
163	2	4	9	1	62	72	46	-26	10	-16	0	91	92	93	1	1	2	95	97	97	0	2	2	13	12	-1	34214374	64	1	1.71	57.1	19.5274	0	0	0	0	0	0	0	0	0	1	0	0	1	1	3	0	2
164	2	4	9	1	62	83	87	4	21	25	1	91	102	95	-7	11	4	95	98	97	-1	3	2	8	8	0	15330719	70	2	1.424	46	22.685	0	0	0	0	0	1	0	0	0	0	0	1	2	1	2	0	4
165	2	4	9	1	62	75	57	-18	13	-5	0	91	92	85	-7	1	-6	95	98	97	-1	3	2	9	8	-1	30833344	70	1	1.711	64.55	22.0494	1	0	0	0	0	0	0	0	0	0	0	0	0	0	1	0	8
165	1	1	22	1	11	40	52	12	29	41	1	81	90	85	-5	9	4	97	97	97	0	0	0	6	10	4	30833344	70	1	1.711	64.55	22.0494	1	0	0	0	0	0	0	0	0	0	0	0	0	0	1	0	8
166	1	3	8	1	11	78	45	-33	67	34	1	72	90	65	-25	18	-7	96	96	95	-1	0	-1	15	10	-5	14838317	77	1	1.557	62.1	25.6162	0	0	0	1	0	0	0	1	0	0	0	0	2	0	2	0	1
167	2	4	9	1	62	79	82	3	17	20	1	91	91	94	3	0	3	95	98	97	-1	3	2	10	9	-1	34327921	45	1	1.738	77.55	25.6733	1	0	0	0	0	0	0	0	0	0	0	0	0	0	1	0	2
167	1	1	22	1	11	42	78	36	31	67	1	81	97	92	-5	16	11	97	98	94	-4	1	-3	6	12	6	34327921	45	1	1.738	77.55	25.6733	1	0	0	0	0	0	0	0	0	0	0	0	0	0	1	0	2
168	3	4	5	1	30	13	70	57	-17	40	1	82	71	77	6	-11	-5	97	98	96	-2	1	-1	21	14	-7	34291524	59	2	1.627	52.15	19.7006	0	0	0	0	1	0	0	0	1	0	0	0	2	0	2	0	6
169	3	4	5	1	30	60	72	12	30	42	1	82	101	108	7	19	26	97	96	96	0	-1	-1	24	15	-9	19313458	43	2	1.661	40.8	14.7884	0	0	0	0	0	0	0	0	0	1	0	0	1	1	2	0	12
170	3	4	5	1	30	90	93	3	60	63	1	82	108	90	-18	26	8	97	96	96	0	-1	-1	16	7	-9	34235623	62	1	1.6	66.55	25.9961	1	0	0	0	0	0	0	0	0	0	0	0	0	0	2	0	3
171	3	4	5	1	30	77	75	-2	47	45	1	82	93	101	8	11	19	97	95	95	0	-2	-2	21	12	-9	34170396	49	2	1.582	66	26.3713	1	0	0	0	0	0	0	0	0	0	0	0	0	1	1	0	3
172	3	4	5	1	30	46	37	-9	16	7	1	82	82	76	-6	0	-6	97	95	95	0	-2	-2	18	9	-9	34308903	50	1	1.756	86.3	27.9873	1	0	0	0	0	0	0	0	0	0	0	0	0	0	2	0	9
173	2	4	9	1	62	85	48	-37	23	-14	0	91	99	80	-19	8	-11	95	97	98	1	2	3	10	14	4	34190803	78	1	1.553	61.15	25.3544	0	1	0	1	1	1	0	1	0	0	0	0	5	0	2	0	0
173	1	1	22	1	11	62	87	25	51	76	1	81	87	84	-3	6	3	97	97	97	0	0	0	6	11	5	34190803	78	1	1.553	61.15	25.3544	0	1	0	1	1	1	0	1	0	0	0	0	5	0	2	0	0
174	2	4	9	1	62	55	39	-16	-7	-23	0	91	91	86	-5	0	-5	95	95	97	2	0	2	8	10	2	34307933	54	2	1.567	84.8	34.5349	0	0	0	0	0	0	0	1	0	0	0	0	1	1	2	0	0
174	1	1	22	1	11	52	86	34	41	75	1	81	97	91	-6	16	10	97	97	97	0	0	0	6	13	7	34307933	54	2	1.567	84.8	34.5349	0	0	0	0	0	0	0	1	0	0	0	0	1	1	2	0	0
175	2	4	9	1	62	58	43	-15	-4	-19	0	91	58	43	-15	-33	-48	95	95	96	1	0	1	11	11	0	22109993	79	1	1.7	70	24.2215	0	0	0	0	0	0	0	0	0	0	1	0	1	0	2	0	0
175	1	1	22	1	11	49	79	30	38	68	1	81	88	88	0	7	7	97	95	97	2	-2	0	6	6	0	22109993	79	1	1.7	70	24.2215	0	0	0	0	0	0	0	0	0	0	1	0	1	0	2	0	0
176	1	3	8	1	11	6	15	9	-5	4	1	72	65	70	5	-7	-2	96	97	97	0	1	1	13	17	4	31440694	59	1	1.731	83.7	27.9339	0	0	0	0	0	0	0	1	0	1	0	0	2	1	2	0	3
177	2	4	9	1	62	76	83	7	14	21	1	91	92	93	1	1	2	95	97	98	1	2	3	11	10	-1	25559551	46	2	1.62	59.9	22.8243	1	0	0	0	0	0	0	0	0	0	0	0	0	1	1	0	0
178	2	4	9	1	62	90	80	-10	28	18	1	91	78	93	15	-13	2	95	96	99	3	1	4	13	11	-2	22598814	67	1	1.51	49.3	21.6219	0	0	0	0	0	1	0	1	0	0	0	0	2	1	2	0	0
179	2	4	9	1	62	68	57	-11	6	-5	0	91	86	82	-4	-5	-9	95	97	98	1	2	3	11	13	2	33960423	53	1	1.83	78.9	23.56	0	0	0	0	0	1	0	0	0	0	0	0	1	0	2	0	0
179	1	1	22	1	11	56	48	-8	45	37	1	81	91	86	-5	10	5	97	97	97	0	0	0	6	18	12	33960423	53	1	1.83	78.9	23.56	0	0	0	0	0	1	0	0	0	0	0	0	1	0	2	0	0
180	2	4	9	1	62	60	84	24	-2	22	1	91	92	87	-5	1	-4	95	96	95	-1	1	0	10	9	-1	6824059	75	2	1.543	38.5	16.1707	0	0	0	0	0	0	0	1	0	0	0	0	1	0	2	0	0
180	1	1	22	1	11	46	67	21	35	56	1	81	87	76	-11	6	-5	97	97	96	-1	0	-1	15	9	-6	6824059	75	2	1.543	38.5	16.1707	0	0	0	0	0	0	0	1	0	0	0	0	1	0	2	0	0
181	2	4	9	1	62	39	78	39	-23	16	1	91	83	93	10	-8	2	95	96	93	-3	1	-2	10	8	-2	16333930	67	1	1.71	63	21.5451	1	0	0	0	0	0	0	0	0	0	0	0	0	0	1	1	#NULL!
182	2	4	9	1	62	55	51	-4	-7	-11	0	91	93	84	-9	2	-7	95	99	95	-4	4	0	9	9	0	33151494	79	1	1.61	66	25.462	0	0	0	0	0	1	0	0	0	0	0	0	1	0	2	1	#NULL!
183	2	4	9	1	62	48	61	13	-14	-1	0	91	102	93	-9	11	2	95	98	97	-1	3	2	7	8	1	34308583	78	1	1.69	60.5	21.1827	0	0	0	0	0	1	0	0	0	1	0	0	2	1	2	0	6
183	1	1	22	1	11	42	77	35	31	66	1	81	92	96	4	11	15	97	97	97	0	0	0	6	10	4	34308583	78	1	1.69	60.5	21.1827	0	0	0	0	0	1	0	0	0	1	0	0	2	1	2	0	6
185	2	4	9	1	62	76	83	7	14	21	1	91	89	98	9	-2	7	95	97	95	-2	2	0	9	9	0	33383404	47	2	1.688	55.1	19.3378	1	0	0	0	0	0	0	0	0	0	0	0	0	1	2	0	4
185	1	1	22	1	11	69	43	-26	58	32	1	81	79	78	-1	-2	-3	97	97	98	1	0	1	8	8	0	33383404	47	2	1.688	55.1	19.3378	1	0	0	0	0	0	0	0	0	0	0	0	0	1	2	0	4
186	2	4	9	1	62	75	82	7	13	20	1	91	84	89	5	-7	-2	95	95	95	0	0	0	6	7	1	33657190	51	1	1.676	50.5	17.9781	0	0	0	0	1	0	0	0	0	1	0	0	2	1	2	0	2
187	2	4	5	1	30	86	92	6	56	62	1	82	96	108	12	14	26	97	96	96	0	-1	-1	21	9	-12	21680093	78	2	1.421	46	22.7808	1	0	0	0	0	0	0	0	0	0	0	0	0	0	2	0	1
188	1	3	8	1	11	22	55	33	11	44	1	72	73	81	8	1	9	96	95	93	-2	-1	-3	18	15	-3	17591975	48	1	1.78	95	29.9836	0	0	0	0	0	1	0	0	0	0	0	0	1	0	2	0	8
188	2	4	6	2	30	65	30	-35	35	0	0	80	85	80	-5	5	0	97	93	94	1	-4	-3	17	13	-4	17591975	48	1	1.78	95	29.9836	0	0	0	0	0	1	0	0	0	0	0	0	1	0	2	0	8
189	2	4	9	1	62	41	75	34	-21	13	1	91	78	96	18	-13	5	95	96	95	-1	1	0	9	9	0	34326734	68	2	1.565	52	21.2312	1	0	0	0	0	0	0	0	0	0	0	0	0	1	2	0	2
189	1	1	22	1	11	55	72	17	44	61	1	81	85	93	8	4	12	97	97	96	-1	0	-1	10	8	-2	34326734	68	2	1.565	52	21.2312	1	0	0	0	0	0	0	0	0	0	0	0	0	2	2	0	2
190	1	3	8	1	11	8	21	13	-3	10	1	72	66	73	7	-6	1	96	93	93	0	-3	-3	17	20	3	10675812	76	1	1.67	65	23.3067	1	0	0	0	0	0	0	0	0	0	0	0	0	0	2	1	2
191	2	4	9	1	62	54	57	3	-8	-5	0	91	89	80	-9	-2	-11	95	97	96	-1	2	1	11	8	-3	32867086	51	2	1.659	61.05	22.1816	1	0	0	0	0	0	0	0	0	0	0	0	0	0	1	0	6
191	1	1	22	1	11	45	78	33	34	67	1	81	93	92	-1	12	11	97	97	97	0	0	0	7	11	4	32867086	51	2	1.659	61.05	22.1816	1	0	0	0	0	0	0	0	0	0	0	0	0	0	1	0	6
192	2	4	9	1	62	74	73	-1	12	11	1	91	95	87	-8	4	-4	95	97	98	1	2	3	12	12	0	15274001	69	1	1.656	60.6	22.0979	0	0	0	0	0	1	0	0	0	1	0	0	2	0	2	0	2
192	1	1	22	1	11	63	65	2	52	54	1	81	77	81	4	-4	0	97	97	96	-1	0	-1	8	11	3	15274001	69	1	1.656	60.6	22.0979	0	0	0	0	0	1	0	0	0	1	0	0	2	0	2	0	2
193	2	4	9	1	62	62	70	8	0	8	1	91	85	86	1	-6	-5	95	96	98	2	1	3	11	12	1	29821183	67	2	1.513	48	20.9683	0	1	0	0	0	1	0	1	0	0	0	0	3	0	2	0	0
193	1	1	22	1	11	49	77	28	38	66	1	81	83	87	4	2	6	97	96	97	1	-1	0	7	13	6	29821183	67	2	1.513	48	20.9683	0	1	0	0	0	1	0	1	0	0	0	0	3	0	2	0	0
194	2	4	9	1	62	72	85	13	10	23	1	91	95	90	-5	4	-1	95	96	98	2	1	3	11	10	-1	26181911	65	2	1.568	64.25	26.1325	0	0	0	0	0	1	0	0	0	0	0	0	1	0	2	0	0
194	1	1	22	1	11	58	93	35	47	82	1	81	90	112	22	9	31	97	97	97	0	0	0	6	10	4	26181911	65	2	1.568	64.25	26.1325	0	0	0	0	0	1	0	0	0	0	0	0	1	0	2	0	0
195	1	1	22	1	11	82	90	8	71	79	1	81	92	111	19	11	30	97	97	90	-7	0	-7	15	12	-3	23379062	46	2	1.56	70	28.764	0	0	0	0	1	0	0	1	0	0	0	0	2	0	2	0	1
196	2	4	9	1	62	75	70	-5	13	8	1	91	84	86	2	-7	-5	95	97	98	1	2	3	9	10	1	6383141	74	2	1.557	59.9	24.7087	1	0	0	0	0	0	0	0	0	0	0	0	0	0	2	0	1
196	1	1	22	1	11	41	87	46	30	76	1	81	77	84	7	-4	3	97	96	97	1	-1	0	6	10	4	6383141	74	2	1.557	59.9	24.7087	1	0	0	0	0	0	0	0	0	0	0	0	0	0	2	0	1
197	2	4	9	1	62	76	86	10	14	24	1	91	101	86	-15	10	-5	95	98	95	-3	3	0	11	9	-2	17619931	60	2	1.54	47.85	20.1763	1	0	0	0	0	0	0	0	0	0	0	0	0	0	2	0	0
197	1	1	22	1	11	69	75	6	58	64	1	81	82	86	4	1	5	97	97	97	0	0	0	6	6	0	17619931	60	2	1.54	47.85	20.1763	1	0	0	0	0	0	0	0	0	0	0	0	0	0	2	0	0
198	2	4	9	1	62	77	77	0	15	15	1	91	97	90	-7	6	-1	95	100	99	-1	5	4	11	9	-2	34431284	71	2	1.592	85	33.5377	0	1	0	0	0	1	0	1	0	0	0	0	3	0	3	0	0
198	1	1	22	1	11	60	86	26	49	75	1	81	87	113	26	6	32	97	95	97	2	-2	0	6	11	5	34431284	71	2	1.592	85	33.5377	0	1	0	0	0	1	0	1	0	0	0	0	3	0	3	0	0
199	1	1	22	1	11	81	80	-1	70	69	1	81	94	88	-6	13	7	97	97	96	-1	0	-1	9	15	6	34394361	26	1	1.719	86.05	29.1205	1	0	0	0	0	0	0	0	0	0	0	0	0	0	2	0	0
200	2	4	5	1	30	86	80	-6	56	50	1	82	90	86	-4	8	4	97	96	96	0	-1	-1	13	10	-3	34430044	63	1	1.677	76.5	27.2017	1	0	0	0	0	0	0	0	0	0	0	0	0	0	2	0	0
201	2	4	5	1	30	70	88	18	40	58	1	82	88	100	12	6	18	97	96	96	0	-1	-1	17	12	-5	34396762	79	2	1.59	52.1	20.6084	0	0	0	0	1	1	0	0	0	0	0	0	2	0	2	0	1
201	1	1	22	1	23	31	44	13	8	21	1	72	72	78	6	0	6	97	95	94	-1	-2	-3	10	7	-3	34396762	79	2	1.59	52.1	20.6084	0	0	0	0	1	1	0	0	0	0	0	0	2	0	2	0	1
202	2	4	9	1	62	63	42	-21	1	-20	0	91	92	71	-21	1	-20	95	99	98	-1	4	3	10	9	-1	12764798	79	1	1.569	66.6	27.0538	0	0	0	0	0	1	0	0	0	0	0	0	1	0	2	0	0
202	1	1	22	1	11	91	57	-34	80	46	1	81	104	95	-9	23	14	97	97	96	-1	0	-1	6	7	1	12764798	79	1	1.569	66.6	27.0538	0	0	0	0	0	1	0	0	0	0	0	0	1	0	2	0	0
203	1	1	22	1	11	50	36	-14	39	25	1	81	83	71	-12	2	-10	97	97	98	1	0	1	11	7	-4	23926896	77	1	1.594	74.3	29.2423	0	0	0	0	1	1	0	0	0	0	0	0	2	0	2	0	3
203	2	4	9	1	62	51	85	34	-11	23	1	91	82	91	9	-9	0	95	93	96	3	-2	1	7	10	3	23926896	77	1	1.594	74.3	29.2423	0	0	0	0	1	1	0	0	0	0	0	0	2	0	2	0	3
204	1	1	22	1	11	41	67	26	30	56	1	81	89	82	-7	8	1	97	97	99	2	0	2	6	9	3	33366433	56	1	1.594	70	27.55	0	0	0	0	0	1	0	0	0	0	0	0	1	0	2	0	0
204	2	4	9	1	62	37	52	15	-25	-10	0	91	92	93	1	1	2	95	99	98	-1	4	3	9	8	-1	33366433	56	1	1.594	70	27.55	0	0	0	0	0	1	0	0	0	0	0	0	1	0	2	0	0
205	2	5	4	1	33	63	47	-16	30	14	1	74	83	78	-5	9	4	95	97	96	-1	2	1	11	11	0	12615555	81	1	1.594	70	27.55	0	0	1	0	1	0	0	0	0	0	0	0	2	0	2	1	#NULL!
206	1	3	8	1	11	22	46	24	11	35	1	72	75	75	0	3	3	96	90	95	5	-6	-1	16	16	0	19804193	57	1	1.56	58.8	24.1617	0	0	0	0	0	1	0	0	0	0	0	1	2	0	2	0	3
207	1	3	8	1	11	70	34	-36	59	23	1	72	80	85	5	8	13	96	93	96	3	-3	0	17	13	-4	34499324	67	1	1.7	72	24.9135	1	0	0	0	0	0	0	0	0	0	0	0	0	0	3	0	0
208	2	4	9	1	62	72	78	6	10	16	1	91	78	97	19	-13	6	95	98	99	1	3	4	10	9	-1	34394960	76	1	1.554	45.25	18.7377	1	0	0	0	0	0	0	0	0	0	0	0	0	0	2	0	0
208	1	1	22	1	11	82	83	1	71	72	1	81	95	84	-11	14	3	97	97	99	2	0	2	6	6	0	34394960	76	1	1.554	45.25	18.7377	1	0	0	0	0	0	0	0	0	0	0	0	0	0	2	0	0
209	1	1	22	1	11	76	77	1	65	66	1	81	85	88	3	4	7	97	96	95	-1	-1	-2	9	14	5	34269200	41	1	1.712	69.9	23.849	0	0	0	0	0	0	0	0	0	0	1	0	1	0	2	0	6
210	2	4	9	1	62	73	56	-17	11	-6	0	91	92	80	-12	1	-11	95	98	98	0	3	3	11	10	-1	17059747	82	2	1.434	39.1	19.0142	0	0	1	0	0	1	0	0	0	0	0	0	2	0	3	0	0
210	1	1	22	1	11	66	85	19	55	74	1	81	90	101	11	9	20	97	95	95	0	-2	-2	9	12	3	17059747	82	2	1.434	39.1	19.0142	0	0	1	0	0	1	0	0	0	0	0	0	2	0	3	0	0
211	2	4	9	1	62	73	82	9	11	20	1	91	98	99	1	7	8	95	98	97	-1	3	2	17	11	-6	24904492	88	1	1.55	45	18.7305	0	0	0	0	1	1	0	1	0	1	0	0	4	1	3	0	4
211	1	1	22	1	11	30	83	53	19	72	1	81	103	89	-14	22	8	97	97	97	0	0	0	12	9	-3	24904492	88	1	1.55	45	18.7305	0	0	0	0	1	1	0	1	0	1	0	0	4	1	3	0	4
212	2	4	9	1	62	71	73	2	9	11	1	91	94	89	-5	3	-2	95	96	96	0	1	1	10	11	1	34451922	76	2	1.557	62.1	25.6162	0	0	0	0	0	1	0	1	0	0	0	0	2	0	2	0	0
212	1	1	22	1	11	41	50	9	30	39	1	81	85	87	2	4	6	97	96	97	1	-1	0	6	12	6	34451922	76	2	1.557	62.1	25.6162	0	0	0	0	0	1	0	1	0	0	0	0	2	0	2	0	0
213	1	3	8	1	11	78	45	-33	67	34	1	72	90	65	-25	18	-7	96	96	95	-1	0	-1	15	10	-5	14838317	77	1	1.557	62.1	25.6162	0	0	0	1	0	0	0	1	0	0	0	0	2	0	2	0	1
[truncated: 22 more columns]
